# Supplementary material for: Electronic structure of quasi-one-dimensional superconductor K2Cr3As3 from first-principles calculations
Source: Springer Nature journal article supplement (doi:10.1038/srep16054), 2015-11-03
Supplement: 41598_2015_BFsrep16054_MOESM1_ESM.pdf [file 41598_2015_BFsrep16054_MOESM1_ESM.pdf]

# Supplementary Information for Electronic structure of quasi-one-dimensional superconductor $K_2Cr_3As_3$ from first-principles calculations

by Hao Jiang, Guanghan Cao and Chao Cao

## Relativistic DOS and PDOS of $K_2Cr_3As_3$ with experimental structure

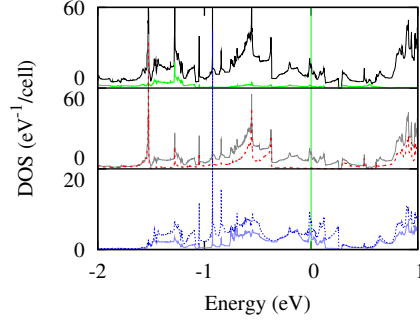

FIG. S-1: Total and projected DOS from relativistic calculations. The upper panel shows the total DOS (black line) and PDOS from As-4p (green line); middle and bottom panel shows the PDOS from all five-orbitals of Cr-3d (grey lines in the middle panel), the PDOS of Cr-3d<sub>xx</sub> and Cr-3d<sub>yy</sub> (red line in the middle panel), and the PDOS of Cr-3d<sub>zz</sub> (light blue line in the bottom panel), Cr-3d<sub>x<sup>2</sup>-y<sup>2</sup></sub> and Cr-3d<sub>xy</sub> (blue line in the bottom panel).

We show here in FIG. S-1a the DOS and PDOS of  $K_2Cr_3As_3$  from relativistic calculations (with SOC effect included). The lattice constants and internal coordinates from experiment were employed. The orbital contribution close to  $E_F$  remains the same as non-relativistic calculations.

## Electronic structure with fully optimized structure

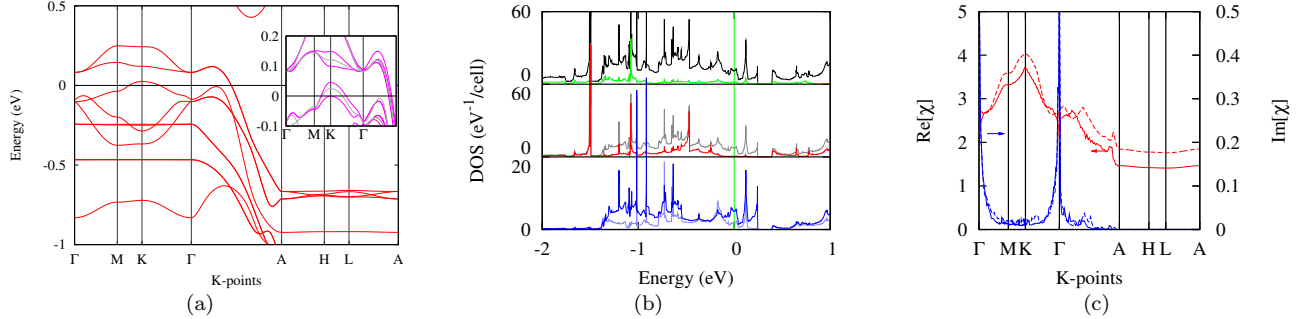

FIG. S-2: (a) Relativistic and non-relativistic band structure, (b) non-relativistic DOS and (c) bare electron susceptibility of  $K_2Cr_3As_3$  with optimized lattice constants and internal coordinates. In panel a), the red lines show the non-relativistic result (without SOC effect) and the blue lines show the relativistic result (with SOC effect). In (b), upper panel shows the total DOS (black line) and PDOS from As-4p (green line); middle and bottom panel shows the PDOS from all five-orbitals of Cr-3d (grey lines in the middle panel), the PDOS of Cr-3d<sub>xx</sub> and Cr-3d<sub>yy</sub> (red line in the middle panel), and the PDOS of Cr-3d<sub>zz</sub> (light blue line in the bottom panel), Cr-3d<sub>x<sup>2</sup>-y<sup>2</sup></sub> and Cr-3d<sub>xy</sub> (blue line in the bottom panel). In (c), The red and blue lines are the real and imaginary part of  $\chi$ , respectively. The solid and dashed lines are results for pristine  $K_2Cr_3As_3$  and 0.2 hole doped  $K_2Cr_3As_3$ , respectively.

We show here the band structure (FIG. S-2a) and DOS (FIG. S-2b) of  $K_2Cr_3As_3$  with optimized lattice constants and internal coordinates. The most profound change in the band structure is that the  $\gamma$  band is submerged below  $E_F$

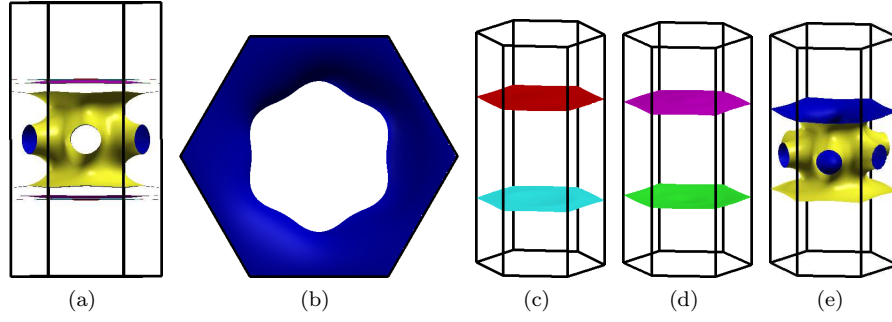

FIG. S-3: Non-relativistic Fermi surface sheets of  $\text{K}_2\text{Cr}_3\text{As}_3$  with optimized lattice constants and internal coordinates. (a) Side-view of all sheets superposed. (b) Top view of 3D  $\gamma$  band sheet. (c-e) 3D view of  $\alpha$ ,  $\beta$ , and  $\gamma$  band sheets, respectively. The choice of high symmetry points is the same as FIG. 3c.

around  $\Gamma$  after structural relaxation. This will lead to a topologically different Fermi surface sheet (FIG. S-3(b-c)) from the one shown in FIG. 3(e-f). The  $\alpha$  and  $\beta$  bands are less affected (FIG. S-3(c-d)). The number of bands crossing  $E_F$ , and their respective orbital character remains the same. Also, it is apparent that the SOC effect is large on  $\gamma$  and  $\beta$ , but is almost negligible for  $\alpha$  (inset of FIG. S-2a).

The resulting non-relativistic band structure was also fitted to a 10-orbital tight-binding Hamiltonian using MLWF. Using this Hamiltonian, we have also calculated the bare electron susceptibility of both pristine  $\text{K}_2\text{Cr}_3\text{As}_3$  and 0.2 hole doped  $\text{K}_2\text{Cr}_3\text{As}_3$  (or,  $\text{K}_{1.8}\text{Cr}_3\text{As}_3$ ) (FIG. S-2c). Despite of the detailed changes in the band structure, the prominent peak of  $\text{Im}\chi_0$  at  $\Gamma$  is insensitive to the structural change.

#### Electronic structure with idealized structure

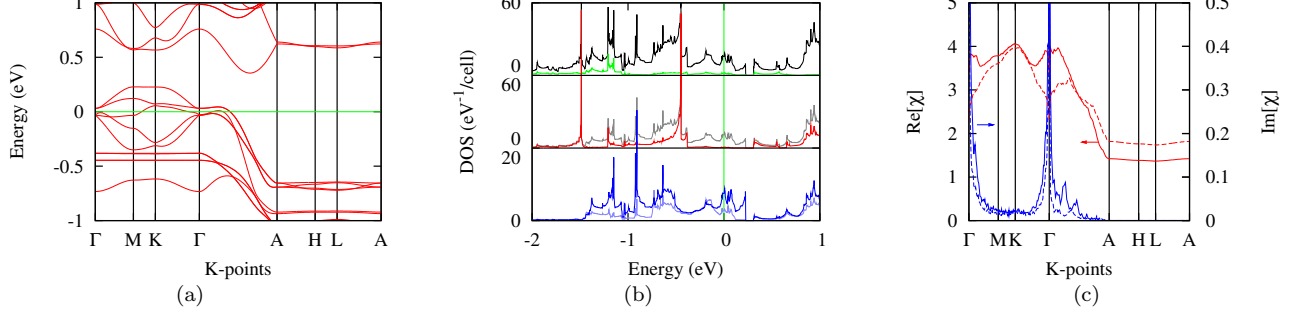

FIG. S-4: Non-relativistic (a) band structure (b) DOS and (c) bare electron susceptibility of  $\text{K}_2\text{Cr}_3\text{As}_3$  with idealized structure. In panel (b), upper panel shows the total DOS (black line) and PDOS from As-4p (green line); middle and bottom panel shows the PDOS from all five-orbitals of Cr-3d (grey lines in the middle panel), the PDOS of Cr-3d<sub>zx</sub> and Cr-3d<sub>zy</sub> (red line in the middle panel), and the PDOS of Cr-3d<sub>z<sup>2</sup></sub> (light blue line in the bottom panel), Cr-3d<sub>x<sup>2</sup>-y<sup>2</sup></sub> and Cr-3d<sub>xy</sub> (blue line in the bottom panel). In panel (c), the red and blue lines are the real and imaginary part of  $\chi$ , respectively. The solid and dashed lines are results for pristine  $\text{K}_2\text{Cr}_3\text{As}_3$  and 0.2 hole doped  $\text{K}_2\text{Cr}_3\text{As}_3$ , respectively.

We have also calculated the nonrelativistic electronic structure of  $\text{K}_2\text{Cr}_3\text{As}_3$  with an idealized structure, i.e. the  $\text{Cr}_6$  cluster forms an ideal octahedron without distortion. We show here the band structure (FIG. S-4a), DOS (FIG. S-4b), bare electron susceptibility  $\chi_0$  (FIG. S-4c) and Fermi surface sheets (FIG. S-5). As indicated in these results, the number of bands crossing  $E_F$ , the respective orbital characters and dimensionality characters of these bands, the number of Fermi surface sheets and the prominent peak of  $\text{Im}\chi_0$  at  $\Gamma$  are insensitive to the structural change.

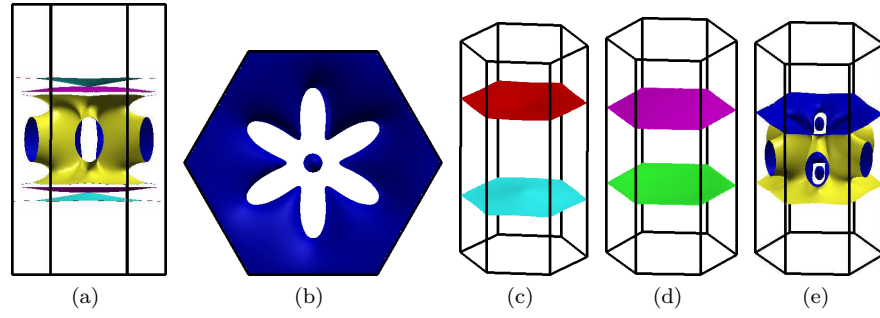

FIG. S-5: Non-relativistic Fermi surface sheets of  $\text{K}_2\text{Cr}_3\text{As}_3$  with an idealized structure. (a) Side-view of all sheets superposed. (b) Top view of 3D  $\gamma$  band sheet. (c-e) 3D view of  $\alpha$ ,  $\beta$ , and  $\gamma$  band sheets, respectively. The choice of high symmetry points is the same as FIG. 3c.

### Electronic structure at DFT+ $U$ level

Figure S-6 shows the electronic structure of  $\text{K}_2\text{Cr}_3\text{As}_3$  under DFT+ $U$  with  $U=2.0$  eV and  $J=0.7$  eV. The band structure, DOS, Fermi surfaces and bare electron susceptibility are almost identical to those without  $U$ , suggesting that DFT+ $U$  is not very effective in the current system and will not affect our main conclusions.

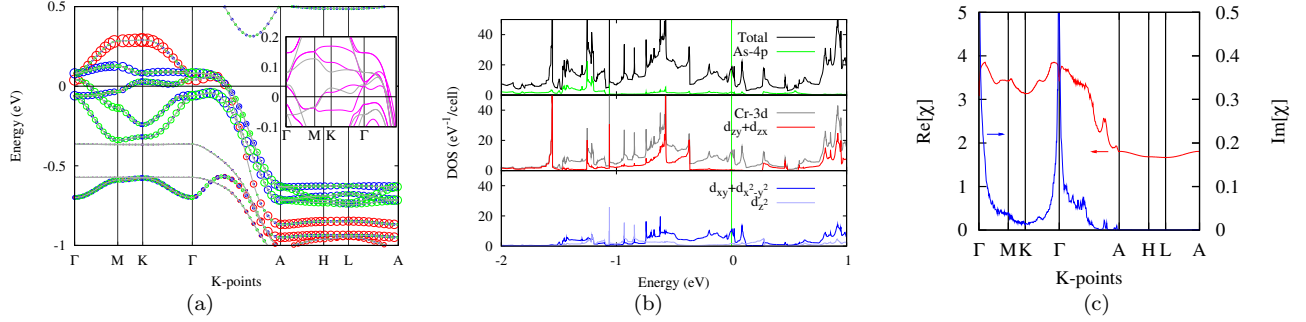

FIG. S-6: (a) Electronic band structure (b) Electron density of states and (c) Bare electron susceptibility of  $\text{K}_2\text{Cr}_3\text{As}_3$  with experimental structure at  $U=2.0$  eV and  $J=0.7$  eV. In panel (a), the inset shows comparison between relativistic (magenta solid lines) and non-relativistic (grey solid lines) results. The size of the red, blue and green circles are proportional to the contributions from the  $d_{z^2}$ ,  $d_{x^2-y^2}$  and  $d_{xy}$  orbitals, respectively. In (b), the upper panel shows the total DOS (black line) and PDOS from As-4p (green line); middle and bottom panel shows the PDOS from all five-orbitals of Cr-3d (grey lines in the middle panel), the PDOS of Cr-3d $_{zx}$  and Cr-3d $_{zy}$  (red line in the middle panel), and the PDOS of Cr-3d $_{z^2}$  (light blue line in the bottom panel), Cr-3d $_{x^2-y^2}$  and Cr-3d $_{xy}$  (blue line in the bottom panel).
